# Supplementary material for: Oxygen vacancies and intense luminescence in manganese loaded Zno microflowers for visible light water splitting
Source: Royal Society of Chemistry journal article supplement (doi:10.1039/c5nr02666k), 2015-01-01
Supplement: c5nr02666k1.pdf [file c5nr02666k1.pdf]

## Electronic Supplementary Information

### Oxygen vacancies and intense luminescence in manganese assisted ZnO microflowers for visible light water splitting

Balaji Sambandam, Robin Jude Vimal Michael and Periakaruppan T Manoharan\*  
Department of Chemistry, Indian Institute of Technology-Madras, Chennai, India 600 036

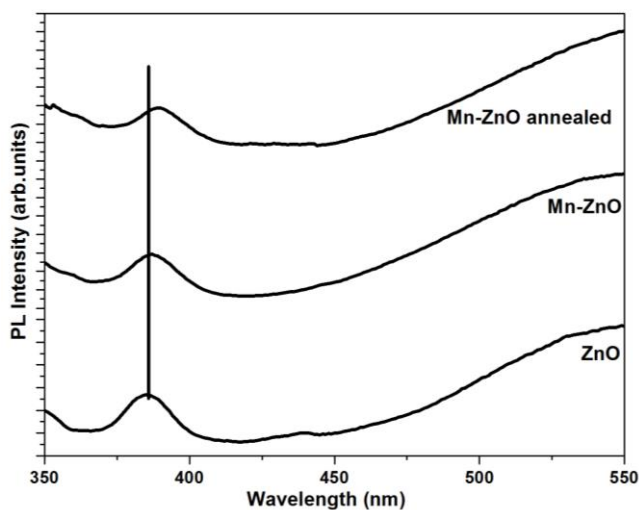

Fig. S1 PL-NBE for ZnO and manganese doped ZnO pre and post annealed samples.

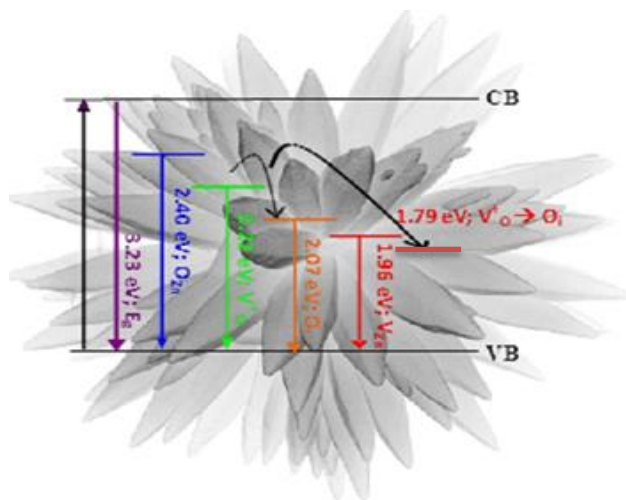

Scheme I. Various energy levels in the forbidden region in nano-petals of ZnO microflower morphology.

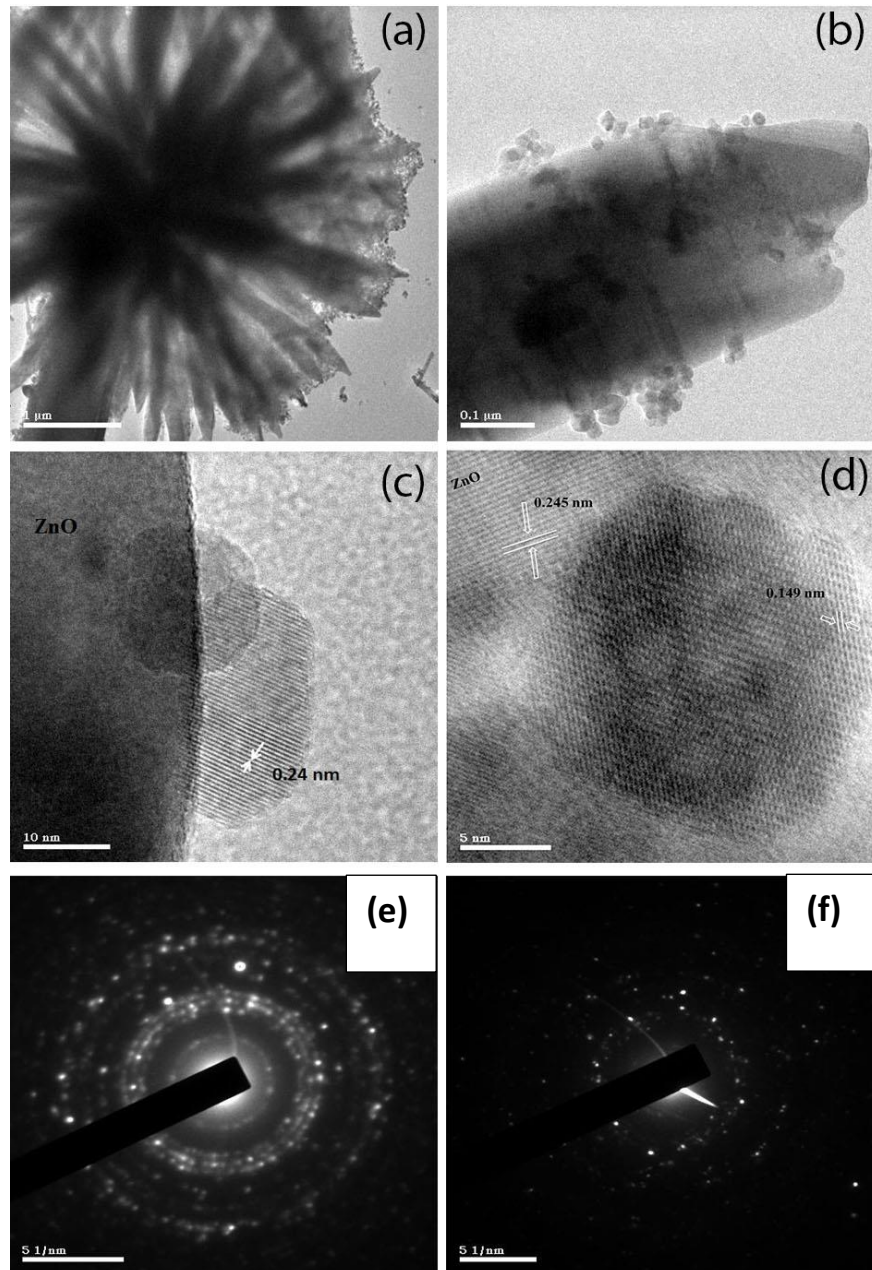

**Fig. S2 HRTEM images of Mn/ZnO microflowers (a) Low magnification of microflower (b) Secondary phases decorated flower-petal (c) and (d) clear lattice fringes of ZnO and secondary phases and (e) and (f) are SAED patterns from (d) in two different places respectively.**

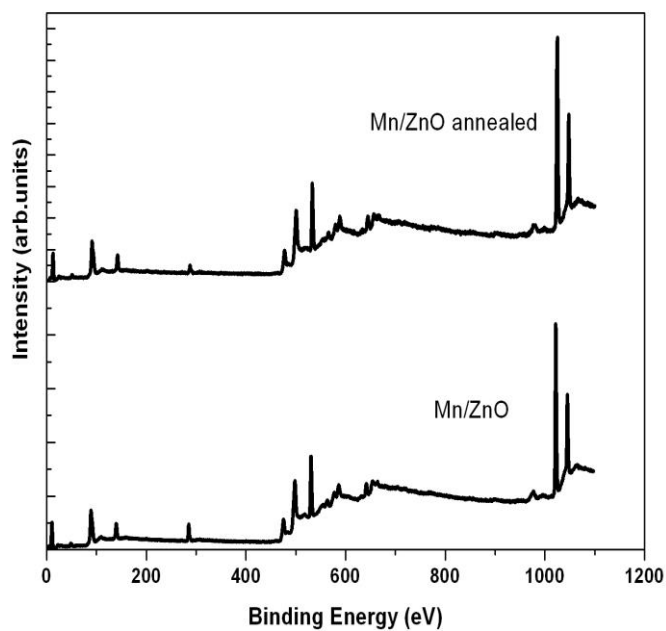

**Fig. S3 XPS Survey spectrum of Mn/ZnO pre and post-annealed materials.**

**Table S1.  $V_o^+$  relative intensity calculation for ZnO, Mn/ZnO and annealed Mn/ZnO materials.**

| Sample          | Position<br>eV | $V_o^+$            |             |
|-----------------|----------------|--------------------|-------------|
|                 |                | Width<br>$cm^{-1}$ | Area<br>a.u |
| ZnO             | 2.24           | 1953               | 9179        |
| Mn/ZnO          | 2.22           | 3028               | 15140       |
| Mn/ZnO annealed | 2.22           | 1821               | 4916        |

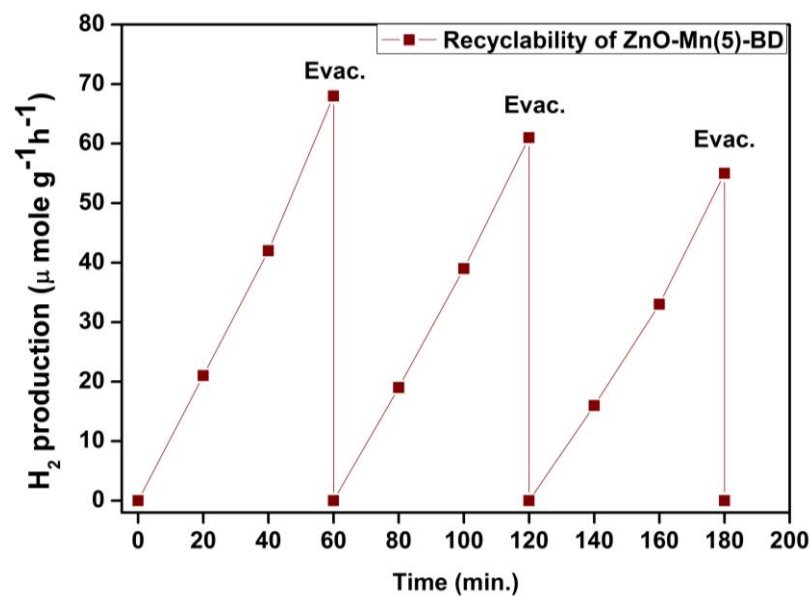

**Fig. S4** Photocatalytic visible light water splitting recyclability test for Mn/ZnO microflowers.
